# Supplementary material for: MOF@PVA beads for dynamic and low concentration VOC capture
Source: Royal Society of Chemistry journal article supplement (doi:10.1039/d2ma00257d), 2022-01-01
Supplement: d2ma00257d1.pdf [file d2ma00257d1.pdf]

## Electronic Supplementary Information for

### MOF@PVA beads for dynamic and low concentration VOC capture

Pamela Berilyn So,<sup>a</sup> Chen-Yu Liu,<sup>a</sup> Yu-Lun Lai,<sup>b</sup> Cheng-Shiuan Lee,<sup>b</sup> and Chia-Her Lin\*<sup>a</sup>

<sup>a</sup> Department of Chemistry, National Taiwan Normal University, Taipei 11677, Taiwan

<sup>b</sup> Green Energy and Environment Research Laboratories, Industrial Technology Research Institute, Hsinchu 31040, Taiwan

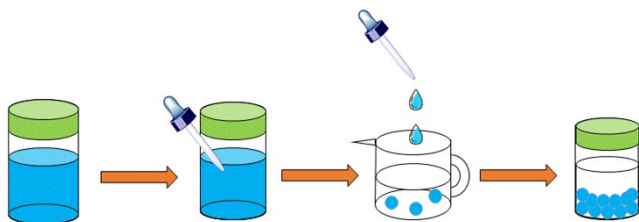

**Scheme S1.** MOF@PVA bead preparation

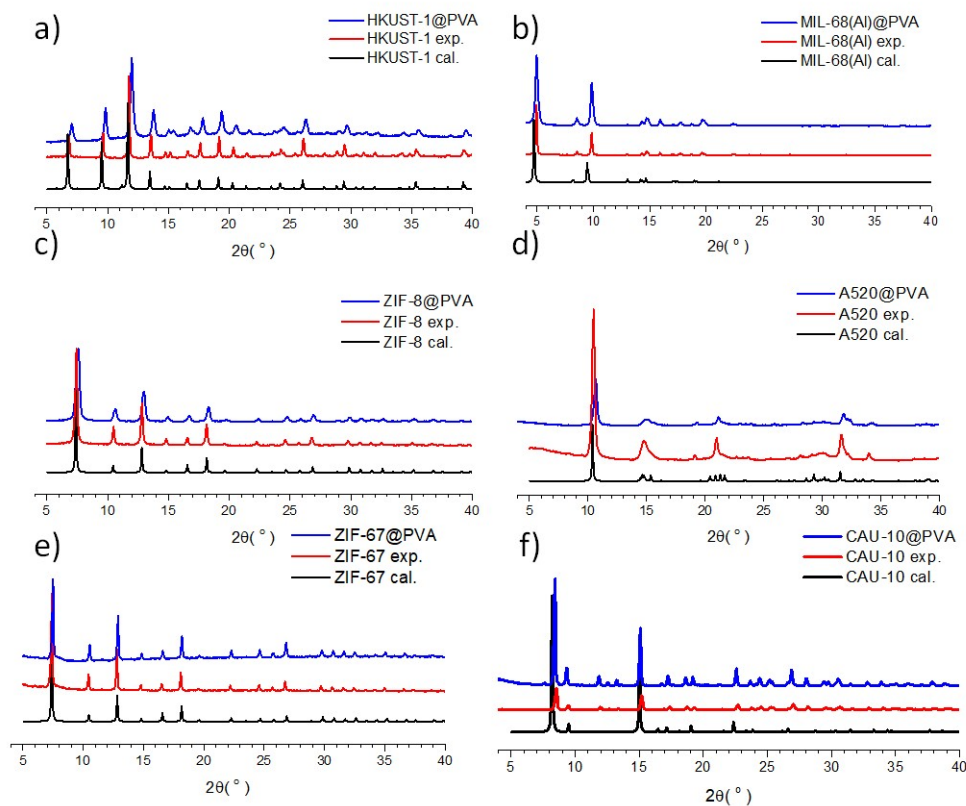

**Figure S1.** PXRD patterns of MOF powders and MOF@PVA beads in comparison with calculated values. a) HKUST-1, b) MIL-68, c) ZIF-8, d) A520, e) ZIF-67, and f) CAU-10.

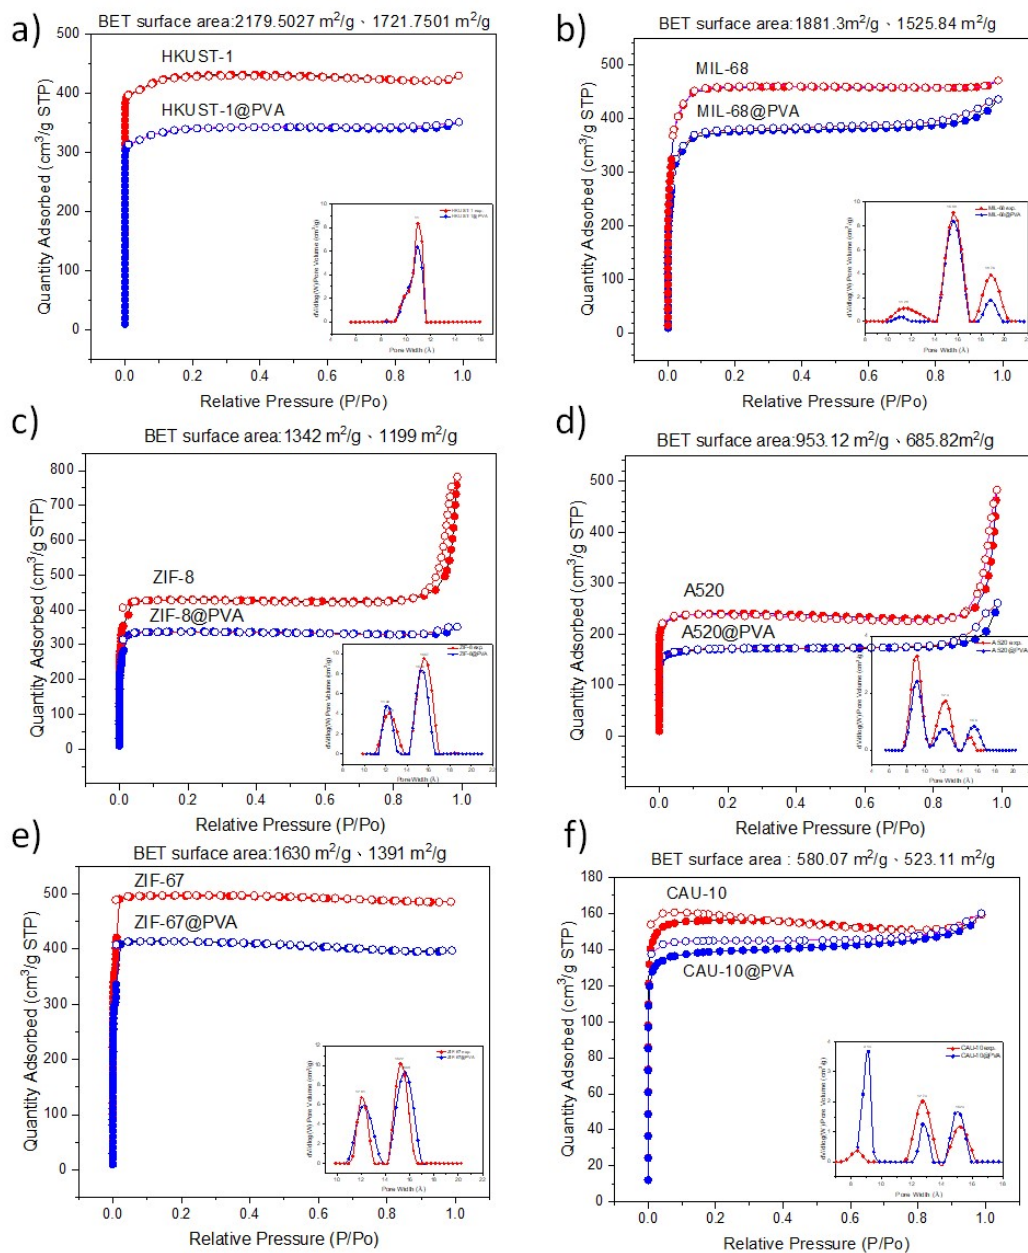

**Figure S2.** Comparison of the  $N_2$  adsorption-desorption isotherm (inset: pore size distribution). a) HKUST-1, b) MIL-68, c) ZIF-8, and d) A520.

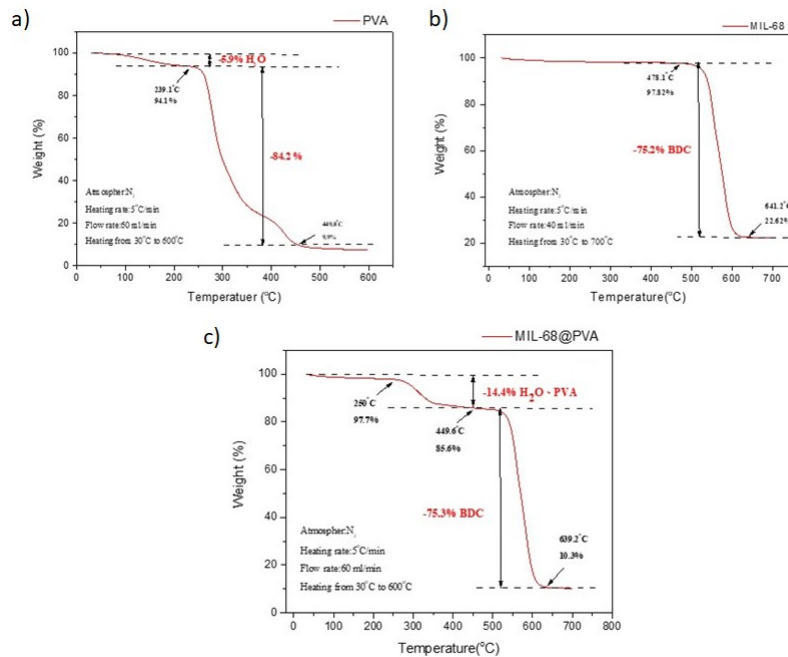

**Figure S3.** Thermogravimetric analyses of a) PVA, b) MIL-68, and c) MIL-68@PVA

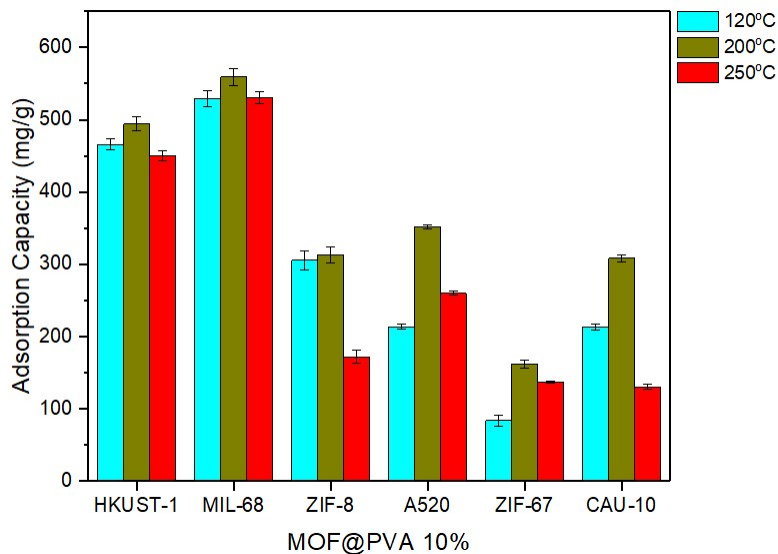

**Figure S4.** Comparison of the different activation temperature on their effect on the adsorption capacities (weights were measured before and after a preliminary 2-hour exposure in the vacuumed glass chamber)

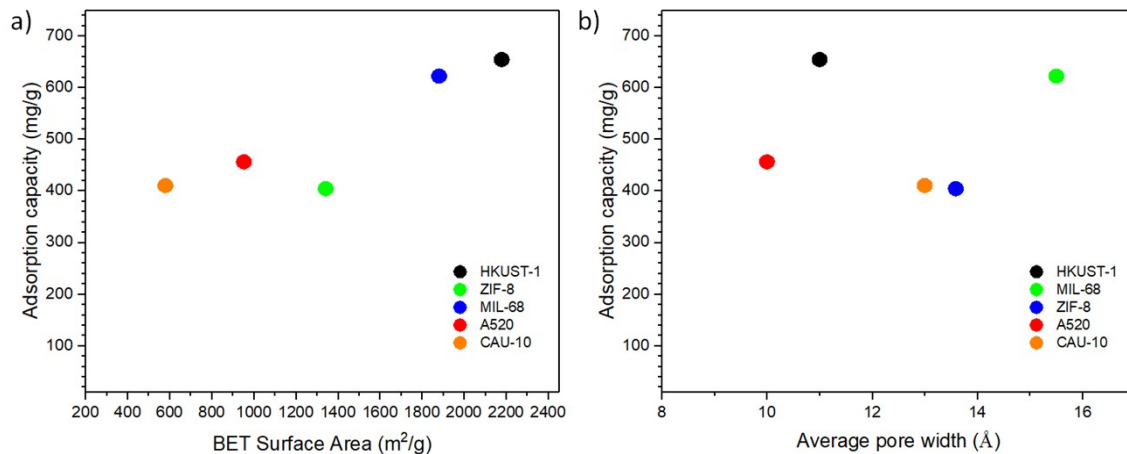

**Figure S5.** Plot of formaldehyde adsorption capacity vs a) BET surface area and b) average pore width of the MOF powder samples.

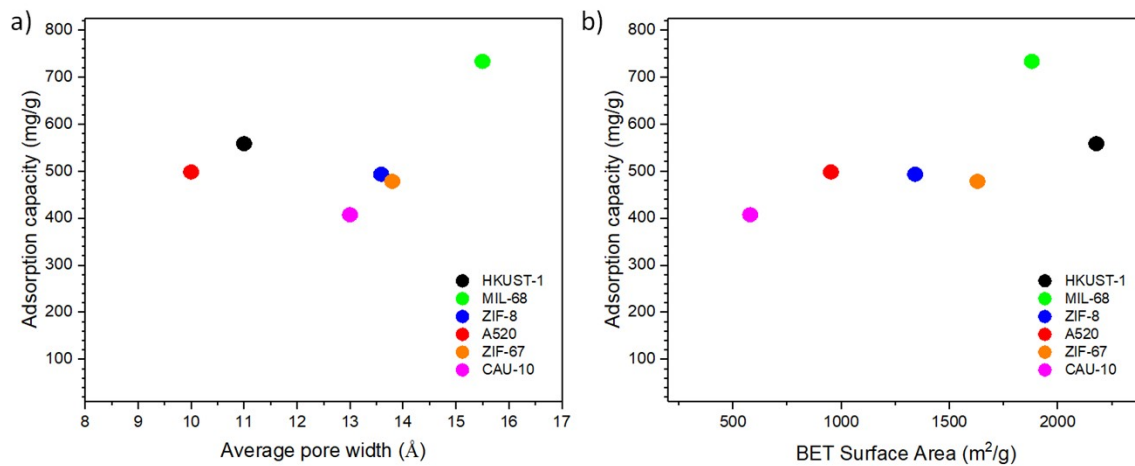

**Figure S6.** Plot of toluene adsorption capacity vs a) average pore width and b) BET surface area of the MOF powder samples.

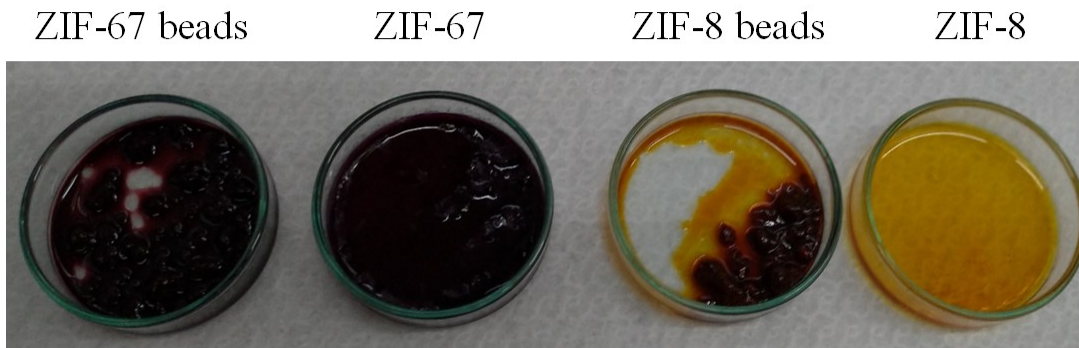

**Figure S7.** ZIF-67@PVA beads, ZIF-67, and ZIF-8@PVA beads, and ZIF-8 after acetic acid exposure

**Table S1.** Comparison of the MOF pore sizes and the kinetic diameters of VOCs

| MOF     | BET surface area (m <sup>2</sup> /g) | Pore size (Å) | VOC          | Kinetic diameter (Å) |
|---------|--------------------------------------|---------------|--------------|----------------------|
| HKUST-1 | 2179                                 | 9, 11         | Acetone      | 4.5                  |
| ZIF-8   | 1341                                 | 12            | IPA          | 4.7                  |
| ZIF-67  | 1630                                 | 15            | Formaldehyde | 2.5                  |
| MIL-68  | 1881                                 | 11, 15.6      | Toluene      | 5.85                 |
| A520    | 953                                  | 9.2           | Acetic acid  | 3.9                  |

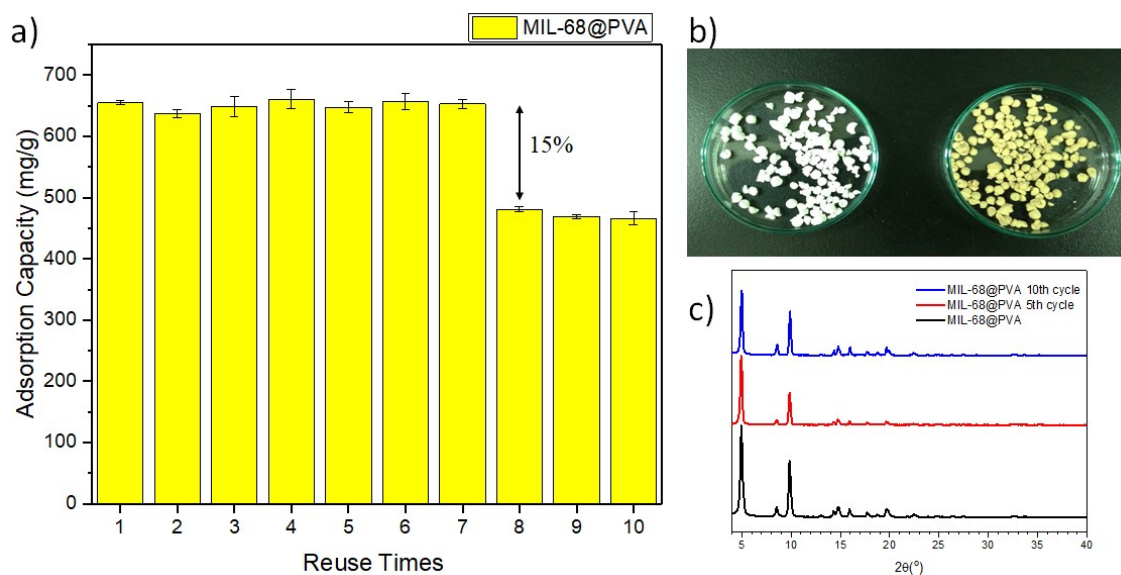**Figure S8.** Characterization for MIL-68@PVA undergoing 10 cycles of toluene adsorption.

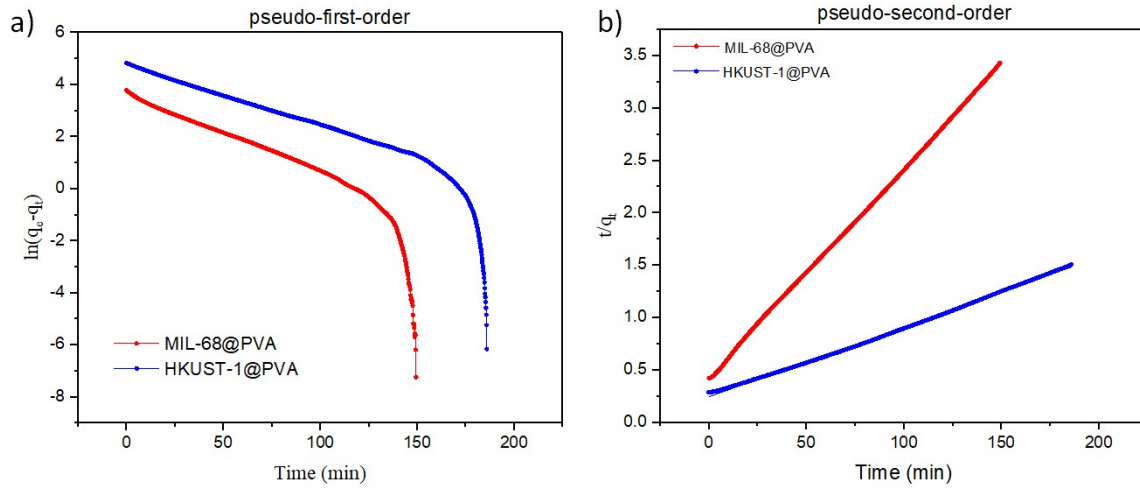

**Figure S9.** Fitted curves of the kinetic models for MIL-68@PVA and HKUST-1@PVA

**Table S2.** Kinetic parameters obtained from the intraparticle diffusion model

| MOF@<br>PVA<br>Beads | External surface<br>adsorption |         |        | Intraparticle diffusion |          |        | Adsorption<br>equilibrium |           |        |
|----------------------|--------------------------------|---------|--------|-------------------------|----------|--------|---------------------------|-----------|--------|
|                      | $K_I$                          | $C_I$   | $R^2$  | $K_{II}$                | $C_{II}$ | $R^2$  | $K_{III}$                 | $C_{III}$ | $R^2$  |
| MIL-68               | 4.9191                         | -1.5684 | 0.9543 | 4.2293                  | 4.5401   | 0.9777 | 1.15114                   | 29.9332   | 0.9734 |
| HKUST-1              | 9.0629                         | -4.6127 | 0.9744 | 13.5953                 | -9.2730  | 0.9908 | 3.6889                    | 75.0765   | 0.9694 |
